# Supplementary material
Source: Springer Nature journal article supplement (https://www.springermedizin.de/resource/supplementary/12885_2010_2537_MOESM1_ESM.pdf/9462450)

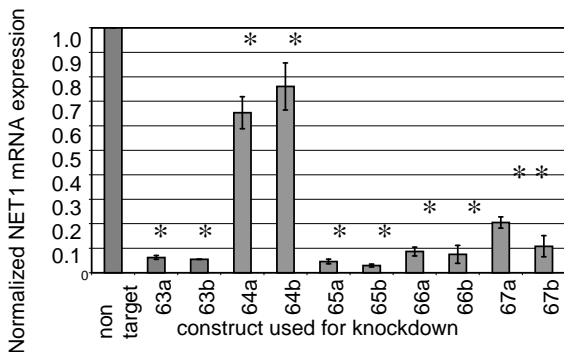

| Cell line | %NET1 knockdown | P value<br>(students t test) |
|-----------|-----------------|------------------------------|
| 63a       | 94%             | P < 0.0001*                  |
| 63b       | 95%             | P = 0.0003*                  |
| 64a       | 35%             | P = 0.01*                    |
| 64b       | 24%             | P = 0.04*                    |
| 65a       | 95%             | P < 0.0001*                  |
| 65b       | 97%             | P < 0.0001*                  |
| 66a       | 91%             | P = 0.0001*                  |
| 66b       | 92%             | P = 0.03*                    |
| 67a       | 79%             | P = 0.0004*                  |
| 67b       | 89%             | P = 0.0008*                  |

Supplement: MOESM1 [file 9462450]
